# Viral Invasion Fitness Across a Continuum from Lysis to Latency

Joshua S. Weitz,<sup>1,2,\*</sup> Guanlin Li,<sup>2</sup> Hayriye Gulbudak,<sup>3</sup> Michael H. Cortez,<sup>4</sup> and Rachel J. Whitaker<sup>5,6</sup>

<sup>1</sup> School of Biological Sciences, Georgia Institute of Technology, Atlanta, GA, USA

<sup>2</sup> School of Physics, Georgia Institute of Technology, Atlanta, GA, USA

<sup>3</sup> Department of Mathematics, University of Louisiana at Lafayette, Lafayette, LA, USA

<sup>4</sup> Department of Mathematics and Statistics, Ecology Center, Utah State University Logan, UT, USA

<sup>5</sup> Department of Microbiology, University of Illinois Urbana-Champaign, Champaign, IL, USA

<sup>6</sup> Carl R. Woese Institute for Genomic Biology,  
University of Illinois Urbana-Champaign, Champaign, IL, USA

(Dated: January 15, 2019)

The prevailing paradigm in ecological studies of viruses and their microbial hosts is that the reproductive success of viruses depends on the proliferation of the “predator”, i.e., the virus particle. Yet, viruses are obligate intracellular parasites, and the virus genome – the actual unit of selection – can persist and proliferate from one cell generation to the next without lysis or the production of new virus particles. Here, we propose a theoretical framework to quantify the invasion fitness of viruses using an epidemiological cell-centric metric that focuses on the proliferation of viral genomes inside cells instead of virus particles outside cells. This cell-centric metric enables direct comparison of viral strategies characterized by obligate killing of hosts (e.g., via lysis), persistence of viral genomes inside hosts (e.g., via lysogeny), and strategies along a continuum between these extremes (e.g., via chronic infections). As a result, we can identify environmental drivers, life history traits, and key feedbacks that govern variation in viral propagation in nonlinear population models. For example, we identify threshold conditions given relatively low densities of susceptible cells and relatively high growth rates of infected cells in which lysogenic and other chronic strategies have higher potential viral reproduction than lytic strategies. Altogether, the theoretical framework helps unify the ongoing study of eco-evolutionary drivers of viral strategies in natural environments.

Viral infections begin with the physical interaction between a virus particle (the “virion”) and the host cell. Infection dynamics within the cell often culminate in lysis, i.e., the active disruption of the integrity of the cell surface, leading to the death of the host cell and the release of infectious virus particles [1, 2]. Virus-induced lysis can be a significant driver of microbial mortality at population scales [3–5]. As a result, studies of the ecological influence of viruses of microorganisms in natural environments have, for the most part, emphasized the impact of the lytic mode of infection. However, the spread of viruses through microbial populations need not involve the immediate lysis of the infected cell.

Indeed, many viruses have alternative strategies. Temperate phage – like phage  $\lambda$  – can integrate their genomes with that of their bacterial hosts, such that the integrated viral DNA, i.e., the prophage, is replicated along with the infected cell, i.e., the lysogen [6]. Chronic viruses, like the filamentous phage M13, infect cells and persist episodically [7, 8], whereby the genome is replicated and then packaged into particles which are released extracellularly without necessarily inducing cell washout [9, 10]. An analogous mode of chronic infection has been observed in archaeal virus-host systems [11]. These examples raise a critical question (see [12–14]): are temperate or chronic modes prevalent or rare in nature?

More than a decade ago, studies of marine, hydrothermal, and soil environments suggested that lysogeny could be more prevalent than assumed based on culture-based

analysis of virus-microbe interactions [15–18]. This evidence has been augmented by recent studies identifying viral dark matter – including integrated and extrachromosomal viral sequences – in microbial genomes [19–21]. Yet, despite increasing evidence of the relevance of persistent infections *in situ* the ecological study of phage has not integrated a common metric to compare the context-dependent fitness of lytic, temperate, and other chronic viral strategies.

A landmark theoretical study provides a setting off point for investigating potential benefits of non-lytic strategies [22]. Using a combination of simulations and local stability analysis, this study proposed that temperate phage could persist over the long term if prophage integration directly enhanced host fitness or enhanced resistance to infections by other lytic phage (“superinfection immunity”). The same study predicted that oscillations in host population abundances could provide an ecological “niche” for temperate phage. In essence, if bacterial densities were too low to support the spread of lytic phage, then temperate phage already integrated into lysogens could persist until “conditions become favorable for the bacteria to proliferate” [22]. Yet this finding does not exclude the possibility that lytic strategies could out-compete temperate strategies – even if lysis at low densities leads to population collapse.

More recently, efforts to understand why viruses should be temperate have drawn upon the mathematical theory of bet hedging [23]. According to this application of bet hedging theory, the temperate strategy enables viruses to expand rapidly during stable periods for hosts (via lysis) and mitigate risks of population collapse, particularly during unfavorable periods for hosts (via lysogeny). Such estimates of long-term growth rates are limited in

---

\*Corresponding author: [jswnitz@gatech.edu](mailto:jswnitz@gatech.edu); URL: <http://ecoteory.biology.gatech.edu>

their applicability as they do not include explicit dynamics of infected cells nor subsequent virus-microbe feedback. Moreover, a focus on *long-term* estimates of growth does not address whether or not lysis is the advantageous strategy for a virus at a given *moment* in time. As noted by [23], ecological models that incorporate explicit mechanisms underlying virus-host interactions are required to understand the viability of viral strategies.

In this paper, we draw upon the foundations of mathematical epidemiology to quantify viral fitness measured in terms of the proliferation of *infected cells* instead of virus particles. In doing so, we propose to adapt the basic reproduction number,  $\mathcal{R}_0$ , “arguably the most important quantity in infectious disease epidemiology” [24] to analyze broad classes of virus-microbe dynamics, including those characterized by lytic, latent, and chronic strategies. In particular, our study unifies previous proposed definitions for purely lytic phage (i.e., termed the “phage reproductive number” [25–27]) and application of the  $\mathcal{R}_0$  concept to temperate phage (where virion production requires cell lysis) [28, 29], while also extending the scope of applicability to chronic viral strategies (where virion production does not require cell lysis). Further, we show how using a unified metric to characterize viral invasion dynamics can help predict and explain a continuum of infection strategies observed in different environmental contexts.

## Results

### Cell-centric metric of viral fitness

We consider the spread of viruses through a microbial population. Foundational work in virus-microbe dynamics conceptualized viruses as “predators” and bacteria as their “prey” (sensu [30, 31]) – a paradigm that has become well-established with time (e.g. [32]). Rather than applying the conventions of predator-prey theory, we analyze models of virus-microbe dynamics in terms of the spread of an infectious disease (see Figure 1). The spread of an infectious disease can be quantified in terms of the basic reproduction number,  $\mathcal{R}_0$ , i.e., when  $\mathcal{R}_0 > 1$  then a pathogen is expected to increase its relative abundance in a population [33, 34]. Here we propose the following definition of the basic reproductive number for generalized virus-microbe dynamics:

*$\mathcal{R}_0$ : the average number of new infected cells produced by a single (typical) infected cell and its progeny virions in an otherwise susceptible population.*

This definition of  $\mathcal{R}_0$  counts viral reproduction in terms of infected cells, as in the study of eco-evolutionary dynamics of temperate phage [28, 29], rather than in terms of virus particles. In doing so, this definition builds upon insights from the virocell paradigm [35, 36], wherein the “real living [viral] organism” [35] is an infected

cell actively reproducing new virions, i.e., the “virocell”. However, here we depart from a strict virocell definition, by accounting for transmission via virions and transmission via latent infections, e.g., where viral genomes are integrated into the genomes of their hosts.

As we will show, the cell-centric definition of viral fitness proposed here facilitates comparison of infections caused by “vertical” transmission (i.e., from mother to daughter cell), those caused by “horizontal” transmission (i.e. from an infected cell to another susceptible cell in the population), and those caused by a combination of both routes (e.g., as in chronic viruses). In doing so,  $\mathcal{R}_0$  quantifies fitness at the individual scale, i.e., beginning with the virus infection of a single microbe, and also represents a threshold condition for viral invasion at the population scale. Note that our definition of fitness does not account for feedback between viral population growth and the environment, an issue we return to in the Discussion.

### Obligately lytic viral strategies – a baseline for comparison

Dynamics of obligately lytic viruses and their microbial hosts can be represented via a set of nonlinear differential equations (see Figure 1 for this and other model schematics and Methods for equations). The spread of viruses in an otherwise susceptible population in Eq. (4) were analyzed using the Next-Generation Matrix (NGM) approach (see Materials and Methods). Via NGM, we find that obligately lytic viruses should spread when

$$\mathcal{R}_{hor} = \beta \left( \frac{\phi S^*}{\phi S^* + m} \right) \left( \frac{\eta}{\eta + d'} \right) > 1, \quad (1)$$

where  $\beta$  is the burst size,  $\phi$  is the adsorption rate,  $m$  is the decay rate of virus particles,  $1/\eta$  is the latent period,  $d'$  is the loss rate of infected cells, and  $S^*$  is the equilibrium density of susceptible cells. This threshold value represents the (exclusively) horizontal contributions to the basic reproduction number. This inequality can be understood in two ways (see Figure 1).

First, consider a single virion. Virions successfully adsorb to susceptible hosts at a rate  $\phi S^*$ . In contrast, virions decay at a rate  $m$ . The factor  $\phi S^*/(\phi S^* + m)$  denotes the probability that a virion is adsorbed before it decays. Adsorption need not lead to lysis, instead given a lysis rate of  $\eta$  and a loss rate  $d'$  of infected cells, then only a fraction  $\eta/(\eta + d')$  of infected cells will lyse and release virions before being washed out of the system. Finally, these two probabilities must be multiplied by the burst size  $\beta$ , i.e., the number of new virions released, to yield the average number of new infectious virions produced by a single virion in a susceptible host population. This product is equal to the basic reproduction number,  $\mathcal{R}_{hor}$  (what was previously termed the phage reproductive number [25–27]). When  $\mathcal{R}_{hor}$  exceeds 1 then a single virion produces, on average, more than one virion, of

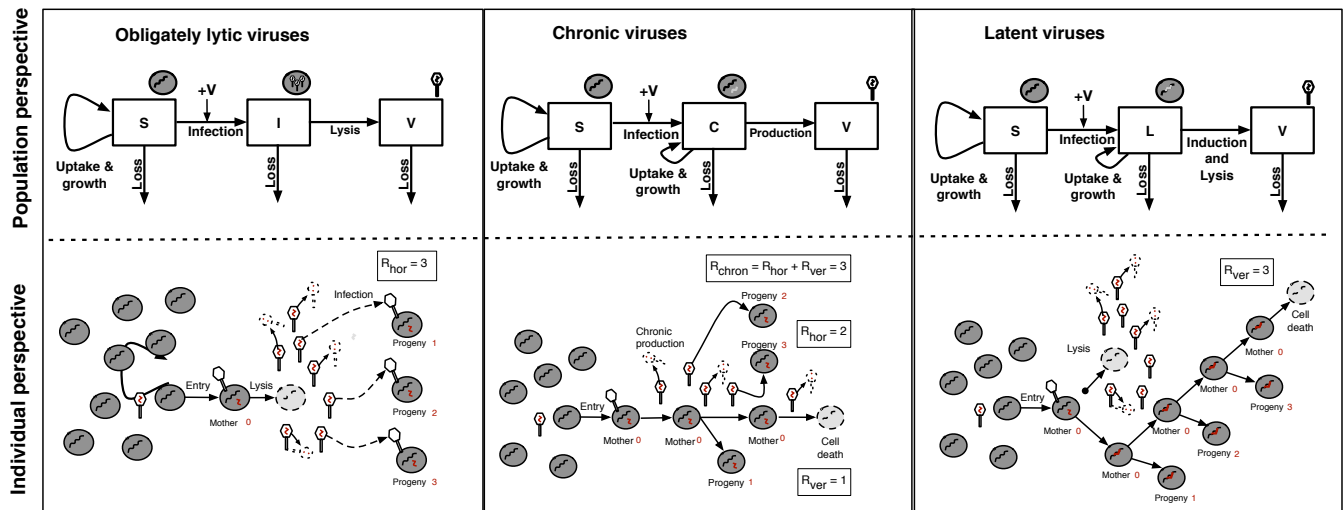

FIG. 1: Schematic of obligately lytic, chronic, and latent strategies, give a population perspective (top) and individual perspective (bottom). (Top) The nonlinear dynamics for each model are presented in the Methods. (Bottom) The basic reproduction number accounts for complete cycles beginning with infected cells. In the obligately lytic case, only three virions of many infect cells, these are progeny, aka new mothers. In the chronic case, the mother cell divides once and two progeny virions infect new cells. In the latent case, the mother cell divides three times before it is removed. In all of these examples, the total reproduction number is the same, albeit with differing contributions from horizontal and vertical transmission routes.

which each in turn produces, on average, more than one virion and so on. Figure 2 shows how viral proliferation varies with life history traits (in this case, the burst size) and the ecological context (in this case, the initial cell density). The critical value  $\mathcal{R}_0 = 1$  defines the threshold between regimes of viral extinction and proliferation.

Second, we can revisit this same calculation beginning with an assumption that there is a single infected cell in an otherwise susceptible population. In that event, the infected cell produces  $\beta$  virions a fraction  $\eta/(\eta + d')$  of the time, of which only a fraction  $\phi S^*/(\phi S^* + m)$  are adsorbed before they decay. The product represents the number of newly infected cells produced by a single infected cell in an otherwise susceptible population. The product is the same, but in this alternative approach we have counted proliferation in terms of a viral life cycle that starts and ends inside cells. Although both interpretations – the virion-centric and the cell-centric – lead to equivalent estimates of  $\mathcal{R}_0$ , we will use the cell-centric definition to unify subsequent comparisons across a spectrum of viral strategies.

### Latent viral strategies

In this section we consider the dynamics of latent viral strategies, such as temperate phage, in which proliferation may be either horizontal or vertical (but not both simultaneously). First, we focus on the case where virus genomes exclusively integrate with host cell genomes which can then be passed on to daughter cells. We use the cell-centric interpretation as before, and consider

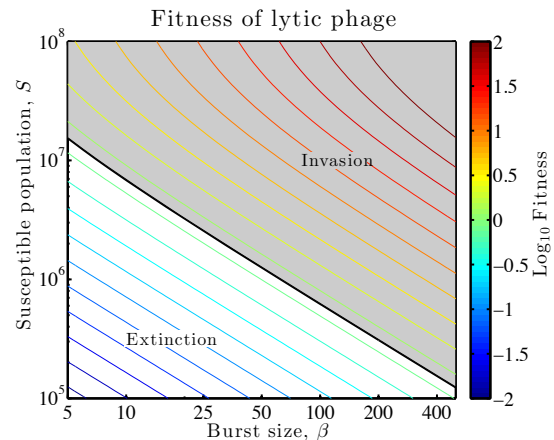

FIG. 2: Virus reproduction as a function of burst size and susceptible cell density. The contours denote the  $\log_{10}$  of  $\mathcal{R}_0$ , as measured using Eq. (1), given variation in burst size,  $\beta$ , and susceptible cell density,  $S$ . Viruses invade when  $\mathcal{R}_{hor} > 1$  or, equivalently when  $\log_{10} \mathcal{R}_{hor} > 0$ . Contours denote combinations of  $(\beta, S^*)$  of equivalent  $\mathcal{R}_{hor}$ . Additional parameters that affect viral reproduction are  $\phi = 6.7 \times 10^{-10}$  ml/hr and  $m = 1/24$  hr $^{-1}$ .

infection dynamics given a single lysogen in an otherwise susceptible population (see Eq. (5)). Via NGM analysis detailed in the Materials and Methods we find that lysogens proliferate when

$$\mathcal{R}_{ver} = \frac{b'(1 - S^*/K)}{d'} > 1, \quad (2)$$

where  $b'$  denotes the division rate of infected cells,  $K$  is the density of susceptible cells in the absence of virus-

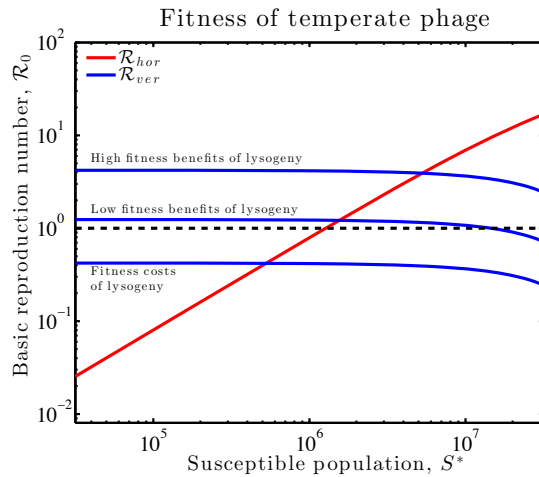

FIG. 3: Basic reproduction number of temperate viruses as a function of susceptible cell density. The increasing (red) line denotes the horizontal  $\mathcal{R}_0$  if temperate phage infect then always lyse cells. The decreasing (blue) line denotes the vertical  $\mathcal{R}_0$  if temperate viruses always integrate with their hosts. Relevant parameters are  $\beta = 50$ ,  $\phi = 6.7 \times 10^{-10}$  ml/hr,  $K = 7.5 \times 10^7$  ml $^{-1}$ , and  $b' = 0.32$ ,  $0.54$  and  $1$  hr $^{-1}$  as well as  $d' = 0.75$ ,  $0.44$ , and  $0.24$  hr $^{-1}$  for the three lysogeny curves from bottom to top respectively.

es, and other parameters are equivalent to the obligately lytic model. Here the value of  $\mathcal{R}_0$  is derived from *vertical* transmission of viral genomes among lysogens.

The basic reproduction number can be interpreted mechanistically. The term  $b'(1 - S^*/K)$  represents the birth rate of lysogens, which decreases with increasing number of cells - whether susceptibles or lysogens. Given that  $d'$  is the death rate of lysogens, the term  $1/d'$  denotes the average lifespan of an individual lysogen. Therefore, this reproduction number is equal to the average number of newly infectious cells produced in the lifetime of the original infection (see Figure 1). When  $\mathcal{R}_{ver}$  exceeds one, then a single lysogen will beget more than one lysogen, on average, and those lysogens will do the same, and so on.

As is evident, lysogens reproduce more frequently when they are subject to less competition with hosts, i.e., when  $S^*$  is small relative to  $K$ . Given the value of  $S^*$ , the basic reproduction number can be written as  $\mathcal{R}_{ver} = (b'/d') / (b/d)$ . Hence, if lysogens have more advantageous life history traits than do susceptible cells then viruses can spread exclusively via vertical transmission. This benefit of lysogeny applies in the immediate term and constitutes direct support for how a lysogen that benefits its host can also benefit the virus. However, if lysogeny comes with a cost (i.e.,  $b'/d'$  lower than  $b/d$ ), then vertical transmission alone will not be enough for  $\mathcal{R}_{ver} > 1$ . Note that  $\mathcal{R}_{ver}$  is a monotonically decreasing function of  $S^*$ , such that increased abundances – all things being equal – diminishes the advantage for vertical transmission.

This analysis raises the question: does a strictly lytic or strictly lysogenic strategy have a higher basic reproduction number? Recall that the horizontal  $\mathcal{R}_0$  is an *increasing* function of susceptible cell density, i.e., when there are more hosts then the value of horizontal transmission increases. The value of  $\mathcal{R}_{hor}$  and  $\mathcal{R}_{ver}$  cross at a critical value,  $S_c$  (see Figure 3). For  $S > S_c$ , then horizontal transmission is favored and for  $S < S_c$  then vertical transmission is favored.

## Chronic viral strategies

Finally, we consider the dynamics of “chronic” virus strategies, or what have been termed “persister” or “producer” strains in other contexts (see Figure 1 and Methods). In a chronic infection both vertical and horizontal transmission can take place concurrently. Via a NGM analysis we find that a small number of chronically infected cells will spread in a population when

$$\mathcal{R}_{chron} \equiv \overbrace{\frac{\alpha}{d'} \left( \frac{\phi S^*}{\phi S^* + m} \right)}^{\text{horizontal}} + \overbrace{\frac{b'(1 - S^*/K)}{d'}}^{\text{vertical}} > 1, \quad (3)$$

where  $\alpha$  is the virus particle production rate and all other parameters are equivalent to those defined in the obligately lytic and latent models. In the horizontal pathway, the chronic cell will remain viable for an average duration of  $1/d'$ . In that time, the chronic cell will produce new virions at a rate  $\alpha$ , of which only  $\phi S^*/(\phi S^* + m)$  will survive to enter another cell. Concurrently, the chronic cell will divide initially at a rate  $b'(1 - S^*/K)$ , which when multiplied by the average cell duration of  $1/d'$  yields the expected number of daughter cells, i.e., representing vertical transmission. A chronic virus will spread at the population scale due to the combination of transmission via horizontal and vertical components.

The spread of chronic viruses depends on both infected cell traits and virion-associated traits. As a consequence, it would suggest that chronic viruses should evolve to improve the sum of horizontal and vertical reproduction. Trade-offs likely constrain the evolution of virion release rates and cell duration. For example, increasing the virion production rate,  $\alpha$ , may improve horizontal reproduction, but if doing so increases cell washout,  $d'$ , then the overall change in  $\mathcal{R}_{chron}$  may be negative. As a result, it is possible that chronic viruses could have the largest reproduction number in an intermediate density regime (see example in Figure 4). Understanding the pleiotropic effects of changes to chronic virus genotypes may provide one route to characterizing the evolution of viral strategies in which both horizontal and vertical transmission rates operate concurrently [37].



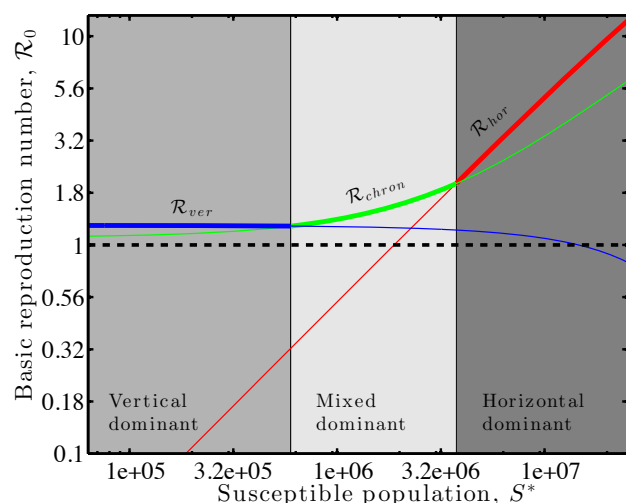

FIG. 4: Viral strategies with the highest  $R_0$  vary with susceptible host density, including exclusively vertical (bold blue, left), mixed (bold green, middle), and horizontal (bold red, right) modes of transmission. Relevant parameters are (i) for obligately lytic viruses (red):  $\beta = 100$ ,  $\phi = 6.7 \times 10^{-10}$  ml/hr, and  $m = 0.13$  hr $^{-1}$ ; (ii) for chronic viruses (green):  $b' = 0.68$  hr $^{-1}$ ,  $d' = 0.63$  hr $^{-1}$ ,  $\alpha = 20$  hr $^{-1}$ ,  $\phi = 3.4 \times 10^{-10}$  ml/hr, and  $m = 0.04$  hr $^{-1}$ ; (iii) for temperate viruses, given vertical transmission (blue)  $b' = 0.54$  hr $^{-1}$ ,  $d' = 0.44$  hr $^{-1}$ , where  $K = 7.5 \times 10^7$  ml $^{-1}$  in all three scenarios given variation in  $S^*$ .

## Discussion

We have proposed a unified theoretical framework to measure the spread of viruses within microbial populations when utilizing strategies spanning a continuum from lysis to latent to chronic. By defining viral reproduction in terms of infected cells, we are able to directly compare the spread of obligately lytic viruses, latent viruses, and chronic viruses in the context of nonlinear population models (see Figure 1). The invasibility of a newly introduced virus is measured in terms of the basic reproduction number, specifically adapted to the life cycle of viral infections of microbial hosts.

At its core, the theoretical framework re-envisioned life history theory for viruses that infect microorganisms. In our calculations, a focal virus genome inside a cell can be thought of as a “mother virus”. These mother viruses may lyse cells and produce “juvenile” offspring, i.e., virus particles. When a virion successfully infects a susceptible host this new infection becomes, once again, a mother virus. This is an example of horizontal transmission. For latent and chronic viruses, the viral genome inside an infected cell may be passed on to both cells upon division. This division is equivalent to direct reproduction of a mother virus, bypassing the juvenile state. This is an example of vertical transmission. Combinations of these two scenarios emerge in applying next-generation matrix theory for calculating the basic reproduction number of viral strategies (see Figures 2-4 and the Materials and Methods).

The critical invasion fitness of a virus strategy, as calculated in terms of  $R_0$ , depends on life history traits as well as susceptible cell density. Obligately lytic viruses have increasing values of  $R_0$  in populations with larger numbers of susceptible hosts. This trend is consistent with experimental findings that fitness of virulent phage  $\lambda$  declines with decreasing susceptible cell density [28]. More broadly, we contend that the link between strategy and susceptible host density will inform ongoing debates on conditions that favor lysogeny and other persistent infections in marine systems; debates that have focused on the ratio of free virus particles and total microbial densities [12–14, 38]. Our analysis makes it evident that evaluating the benefits of latent or chronic strategies also requires consideration of the intracellular infection status of hosts. For example, in our models, strictly (or partially) vertically transmitted viruses may be favored when new susceptible hosts are scarce and when infections benefit host competitive fitness, e.g., through growth or survival. This may help to explain the inverse relationship between inducible lysogen fraction and total microbial abundances in marine environments [39].

The present approach adapts an epidemiological framework beyond temperate phage (as analyzed by [28, 29]) to include obligately lytic and chronic strategies. In doing so, we have focused our analysis on short-term invasion scenarios. Comprehensive understanding of viral strategies requires analysis of both short- and long-term dynamics [40]. This is particularly relevant given that evolutionary dynamics need not lead to the maximization of  $R_0$  (reviewed in [41]). Indeed, long-term fates are influenced by the Malthusian (i.e., exponential) growth rate of viruses which we denote as  $r$ . The basic reproduction number  $R_0$  and  $r$  are related, but they are not equivalent [42] –  $R_0$  measures the speed of viral proliferation in generations (i.e., at the individual level) whereas  $r$  measures the speed of viral proliferation in time (i.e., at the population level) [43].

The threshold condition  $R_0 > 1$  indicates whether the population growth rate  $r$  is positive, but does not predict changes in fitness given viral-host feedback. For example, virus proliferation depletes susceptible hosts, thereby decreasing the ‘effective’ viral fitness of the obligately lytic pathway – an outcome concordant with prior findings from mathematical models and eco-evolutionary experiments involving temperate phage  $\lambda$  and *E. coli* [28]. In the work of [28], obligately virulent phage increased in relative number in environments initially dominated by susceptible cells, whereas temperate phage strains exhibited higher population level growth when susceptible cells were subsequently depleted via lysis. Extrapolating to chronic strategies, we expect that viral production may shift from horizontal to vertical as viruses proliferate through a microbial population.

Systematic analysis of the evolution of viral traits spanning lysis, latent, and chronic strategies in an ecological context is likely to draw upon a substantial body of

work on the evolution of virulence (e.g., [44–51]). Priority areas include the evolution of traits when viral particles can persist for long periods in the environment (similar to epidemiological models of the ‘curse of the pharaoh’ [52, 53]) and the evolution of transmission mode itself [54]. In moving forward, one immediate opportunity is to assess how viruses of microbes evolve virulence levels, or even strategy types, when co-infecting the same microbial population. For example, analysis via the cell-centric approach implies that lytic viruses may reduce niche competition between cells, increasing the benefits of vertical transmission, and enable invasion by latent or chronic viruses [55]. This finding is consistent with repeated evidence of coinfection in microbial genomes between ssDNA filamentous phage (*Inoviridae* that have a chronic lifestyle) and dsDNA phage (*Caudovirales*, that can transmit via lysis) [19]. In addition, interactions of multiple viruses within the same host cell could lead to emergent new feedback strategies. For example, temperate phage can exhibit plastic strategies in which infection outcome depends on the multiplicity of infection [29, 56–60]. However, virus-virus interactions may also extend beyond the cell, e.g., some SPbeta viruses modify the state of bacterial cells through the release of small molecules, thereby shifting decisions between lysis and lysogeny during proliferation [61, 62].

Altogether, the theory presented here provides an additional imperative to develop new measurement approaches to assess the entangled fates of viruses and cells. Measurements of the fitness of viruses with latent and chronic strategies should prioritize estimates of the life history traits of infected cells. Screening for viral genomes and their expression inside cells – whether integrated or persisting episomally – may reveal benefits of viral strategies that have thus far remained hidden when utilizing lysis-based assays or virion counts. By combining measurements and theory, we hope that the present framework provides new opportunities to explore how viruses transform populations, communities, and ecosystems.

## Materials and Methods

**Parameters:** The three model variants we analyze include a set of common parameters as well as parameters unique to particular models. The parameters include  $b$  and  $b'$  (maximal cellular growth rates,  $\text{hr}^{-1}$ ),  $K$  (carrying capacity,  $\text{ml}^{-1}$ ),  $\phi$  (adsorption rate,  $\text{ml/hr}$ ),  $d$  and  $d'$  (cellular death rates,  $\text{hr}^{-1}$ ),  $\beta$  (burst size),  $m$  (virion decay rate  $\text{hr}^{-1}$ ),  $\eta$  (lysis rate,  $\text{hr}^{-1}$ ),  $p$  (scaling factor for lysis,  $0 < p < 1$ ),  $q$  (scaling factor for latency,  $0 < q < 1$ ), and  $\alpha$  (virion production/budding rate,  $\text{hr}^{-1}$ ). Additional context on viral life history traits, including constraints and estimation methods, is described in [63].

**Nonlinear dynamics, lytic strategies:** The coupled system of nonlinear ordinary differential equations (ODEs) for

the lytic system are:

$$\begin{aligned}\frac{dS}{dt} &= \overbrace{bS(1-N/K)}^{\text{logistic growth}} - \overbrace{\phi SV}^{\text{infection}} - \overbrace{dS}^{\text{cell washout}} \\ \frac{dI}{dt} &= \overbrace{\phi SV}^{\text{infection}} - \overbrace{\eta I}^{\text{lysis}} - \overbrace{d'I}^{\text{cell washout}} \\ \frac{dV}{dt} &= \overbrace{\beta \eta I}^{\text{lysis}} - \overbrace{\phi SV}^{\text{infection}} - \overbrace{mV}^{\text{viral decay}}\end{aligned}\quad (4)$$

where  $S$ ,  $I$ , and  $V$  denote the densities of susceptible cells, infected cells, and virus particles, respectively (see [63, 64]).

**Nonlinear dynamics, latent strategies:** The nonlinear ODEs for the latent system are:

$$\begin{aligned}\frac{dS}{dt} &= \overbrace{bS(1-N/K)}^{\text{logistic growth}} - \overbrace{\phi SV}^{\text{infection}} - \overbrace{dS}^{\text{cell washout}} \\ \frac{dL}{dt} &= \overbrace{qb'L(1-N/K)}^{\text{lysogen growth}} + \overbrace{\phi SV}^{\text{infection}} - \overbrace{p\eta L}^{\text{lysis}} - \overbrace{d'L}^{\text{cell washout}} \\ \frac{dV}{dt} &= \overbrace{\beta p\eta L}^{\text{lysis}} - \overbrace{\phi SV}^{\text{infection}} - \overbrace{mV}^{\text{viral decay}}\end{aligned}\quad (5)$$

where  $S$ ,  $L$ , and  $V$  denote densities of susceptible cells, lysogens (latent cells), and virus particles, respectively, and the total number of cells is  $N = S + L$ . Here, the relative rate of lysogenic growth and cellular lysis is controlled by the scaling factors  $q$  and  $p$ . When  $q = 1$  and  $p = 0$  then all infections are strictly latent and only lead to lysogenic growth. In contrast, when  $q = 0$  and  $p = 1$  then all infections are strictly lytic and only lead to cellular lysis. This is a variant of a nutrient-explicit formulation considered as part of an analysis of the tradeoffs underlying lysis and lysogeny for marine viruses [65]. Of note, this model does not include the absorption of virus particles to latent cells nor the degradation of prophage (i.e., ‘curing’).

**Nonlinear dynamics, chronic strategies:** The nonlinear ODEs for the chronic strategies are:

$$\begin{aligned}\frac{dS}{dt} &= \overbrace{bS(1-N/K)}^{\text{logistic growth}} - \overbrace{\phi SV}^{\text{infection}} - \overbrace{dS}^{\text{cell washout}} \\ \frac{dC}{dt} &= \overbrace{b'C(1-N/K)}^{\text{logistic growth}} + \overbrace{\phi SV}^{\text{infection}} - \overbrace{d'C}^{\text{cell washout}} \\ \frac{dV}{dt} &= \overbrace{\alpha C}^{\text{virion production}} - \overbrace{\phi SV}^{\text{infection}} - \overbrace{mV}^{\text{viral decay}}\end{aligned}\quad (6)$$

where  $S$ ,  $C$ , and  $V$  denote densities of susceptible cells, chronically infected cells, and virus particles, respectively, and the total number of cells is  $N = S + C$ . Although the nonlinear population model of Eq. (6) be remapped to the latency model (Eq. (5)), this system of equations represents distinct mechanistic processes, including establishment of a chronically infected cell and release of virions from chronically infected cells without lysis at a per-capita rate  $\alpha$ . Of note, this model assumes that infected mother and daughter cells both retain a copy of the viral genome. Partial fidelity of the vertical viral transmission process could be represented via a birth-dependent transfer of population from the  $C$  to the  $S$  states.

**Next-generation matrix (NGM):** We use the next-generation matrix (NGM) approach to calculate  $\mathcal{R}_0$  in mathematical models of interactions between cells and viruses. We follow the convention of Dieckmann and colleagues in analyzing the subset of the epidemiological model including infected subclasses [34]. In the case of viruses of microbes, we denote those infected subclasses to include any population type that has an infectious viral genome, i.e., both infected cells and virus particles.

**NGM - Obligate lytic interactions:** We linearize the dynamics of Eq.(4) around the virus-free equilibrium,  $(S^*, 0, 0)$  where  $S^* = K(1 - d/b)$ , and focus on the infected subsystem of  $X(t) = [I(t) V(t)]^T$ . The linearized infected subsystem dynamics can be written as  $\dot{X} = (T + \Sigma)X$  where

$$T = \begin{bmatrix} 0 & \phi S^* \\ 0 & 0 \end{bmatrix} \quad (7)$$

denote transmissions events (i.e., corresponding to epidemiological births) and

$$\Sigma = \begin{bmatrix} -\eta - d' & 0 \\ \beta\eta & -\phi S^* - m \end{bmatrix} \quad (8)$$

denote transition events (i.e., corresponding to changes in the state of viral genomes, including loss of infections). Via the NGM theory, the basic reproduction number  $\mathcal{R}_0$  corresponds to the largest eigenvalue of the matrix  $-T\Sigma^{-1}$ . The  $i, j$  matrix elements of  $\Sigma^{-1}$  correspond to the expected duration in state  $i$  of a viral genome that begins in state  $j$ . For this model,

$$-\Sigma^{-1} = \begin{bmatrix} \frac{1}{\eta + d'} & 0 \\ \frac{\beta}{\phi S^* + m} \left( \frac{\eta}{\eta + d'} \right) & \frac{1}{\phi S^* + m} \end{bmatrix} \quad (9)$$

As a consequence, the basic reproduction number is:

$$\mathcal{R}_0 = \frac{\beta\phi S^*}{\phi S^* + m} \left( \frac{\eta}{\eta + d'} \right) \quad (10)$$

**NGM - Latent strategies:** The linearized infected subsystem dynamics of Eq.(5) where  $X(t) = [L(t) V(t)]^T$  can be written as  $\dot{X} = (T + \Sigma)X$  where

$$T = \begin{bmatrix} qb'(1 - S^*/K) & \phi S^* \\ 0 & 0 \end{bmatrix} \quad (11)$$

denote transmission events and

$$\Sigma = \begin{bmatrix} -p\eta - d' & 0 \\ \beta p\eta & -\phi S^* - m \end{bmatrix} \quad (12)$$

denote transition events. For this model,

$$-\Sigma^{-1} = \begin{bmatrix} \frac{1}{d' + p\eta} & 0 \\ \left( \frac{\beta p\eta}{p\eta + d'} \right) \frac{1}{\phi S^* + m} & \frac{1}{\phi S^* + m} \end{bmatrix} \quad (13)$$

As a consequence, the basic reproduction number is:

$$\mathcal{R}_0 = \frac{qb'(1 - S^*/K)}{d' + p\eta} + \frac{\beta\phi S^*}{\phi S^* + m} \left( \frac{p\eta}{p\eta + d'} \right) \quad (14)$$

**NGM - Chronic strategies:** The linearized infected subsystem dynamics of Eq.(6) where  $X(t) = [I(t) V(t)]^T$  can be written as  $\dot{X} = (T + \Sigma)X$  where

$$T = \begin{bmatrix} b'(1 - S^*/K) & \phi S^* \\ 0 & 0 \end{bmatrix} \quad (15)$$

denote transmission events and

$$\Sigma = \begin{bmatrix} -d' & 0 \\ \alpha & -\phi S^* - m \end{bmatrix} \quad (16)$$

denote transition events. For this model,

$$-\Sigma^{-1} = \begin{bmatrix} \frac{1}{d'} & 0 \\ \left( \frac{\alpha}{d'} \right) \frac{1}{\phi S^* + m} & \frac{1}{\phi S^* + m} \end{bmatrix} \quad (17)$$

As a consequence, the basic reproduction number is:

$$\mathcal{R}_0 = \frac{b'(1 - S^*/K)}{d'} + \frac{\phi S^*}{\phi S^* + m} \left( \frac{\alpha}{d'} \right) \quad (18)$$

**Data availability statement** Simulation code is written in MATLAB and available at <https://github.com/WeitzGroup/virfitness>.

**Correspondence:** Requests for materials and correspondence should be directed to JSW ([jsweitz@gatech.edu](mailto:jsweitz@gatech.edu)).

**Acknowledgments** JSW thanks J. Lennon, M. O'Malley, and the participants of a 2017 CIFAR-GBMF workshop on 'A Continuum of Persistence' for discussions critical to the development of ideas in this paper. The authors thank S. Brown, J. Dushoff, S. Elena, B. Levin, M. Sullivan, and S. Wilhelm for comments and feedback on the manuscript. This work was supported by a grant from the Simons Foundation (SCOPE Award ID 329108, J.S.W.), an Allen Distinguished Investigator Grant (to R.J.W.), and a NSF Dimensions of Biodiversity grant 1342876 (to J.S.W. and R.J.W.).

**Contributions:** JSW and RJW designed the study. JSW, GL, HG, and MHC contributed analytic methods. JSW performed computational analyses. JSW, MHC, and RJW wrote the paper.

- 1 Calendar, R. L. (ed.) *The Bacteriophages* (Oxford University Press USA, 2005).
- 2 Dimmock, N. J., Easton, A. J. & Leppard, K. N. *Introduction to Modern Virology* (Blackwell Publishing, Malden, MA, 2007), 5th edn.
- 3 Suttle, C. A. Marine viruses - major players in the global ecosystem. *Nature Reviews Microbiology* **5**, 801–812 (2007).

- 4 Brum, J. R. & Sullivan, M. B. Rising to the challenge: accelerated pace of discovery transforms marine virology. *Nat Rev Micro* **13**, 147–159 (2015).
- 5 Breitbart, M., Bonnain, C., Malki, K. & Sawaya, N. A. Phage puppet masters of the marine microbial realm. *Nature Microbiology* **3**, 754–766 (2018).
- 6 Ptashne, M. *A Genetic Switch: Phage Lambda Revisited* (Cold

- Spring Harbor Laboratory Press, Cold Spring Harbor, NY, 2004), 3rd edn.
- 7 Salivar, W. O., Tzagoloff, H. & Pratt, D. Some physical-chemical and biological properties of the rod-shaped coliphage m13. *Virology* **24**, 359 – 371 (1964).
- 8 Jaenisch, R., Jacob, E. & Hofschneider, P. H. Replication of the small coliphage M13: evidence for long-living M13 specific messenger RNA. *Nature* (1970).
- 9 Smeal, S. W., Schmitt, M. A., Pereira, R. R., Prasad, A. & Fisk, J. D. Simulation of the M13 life cycle I: Assembly of a genetically-structured deterministic chemical kinetic simulation. *Virology* **500**, 259 – 274 (2017).
- 10 Smeal, S. W., Schmitt, M. A., Pereira, R. R., Prasad, A. & Fisk, J. D. Simulation of the M13 life cycle II: Investigation of the control mechanisms of M13 infection and establishment of the carrier state. *Virology* **500**, 275 – 284 (2017).
- 11 Snyder, J. C., Bolduc, B. & Young, M. J. 40 years of archaeal virology: Expanding viral diversity. *Virology* **479–480**, 369 – 378 (2015). 60th Anniversary Issue.
- 12 Knowles, B. *et al.* Lytic to temperate switching of viral communities. *Nature* **531**, 466–470 (2016).
- 13 Weitz, J. S., Beckett, S. J., Brum, J. R., Cael, B. B. & Dushoff, J. Lysis, lysogeny and virus–microbe ratios. *Nature* **549**, E1–E3 (2017).
- 14 Knowles, B. & Rohwer, F. Knowles & rohwer reply. *Nature* **549**, E3–E4 (2017).
- 15 Williamson, S. J., Houchin, L. A., McDaniel, L. & Paul, J. H. Seasonal variation in lysogeny as depicted by prophage induction in tampa bay, florida. *Applied and Environmental Microbiology* **68**, 4307–4314 (2002).
- 16 Williamson, K. E., Radosevich, M., Smith, D. W. & Wommack, K. E. Incidence of lysogeny within temperate and extreme soil environments. *Environmental Microbiology* **9**, 2563–2574 (2007).
- 17 Williamson, S. J. *et al.* The sorcerer ii global ocean sampling expedition: metagenomic characterization of viruses within aquatic microbial samples. *PloS one* **3**, e1456 (2008).
- 18 Paul, J. H. Prophages in marine bacteria: dangerous molecular time bombs or the key to survival in the seas? *The ISME Journal* **2**, 579–589 (2008).
- 19 Roux, S., Hallam, S., Woyke, T. & Sullivan, M. Viral dark matter and virus–host interactions resolved from publicly available microbial genomes. *eLife* **4**, e08490 (2015).
- 20 Luo, E., Aylward, F. O., Mende, D. R. & DeLong, E. F. Bacteriophage distributions and temporal variability in the ocean’s interior. *mBio* **8** (2017).
- 21 Kim, M.-S. & Bae, J.-W. Lysogeny is prevalent and widely distributed in the murine gut microbiota. *The ISME Journal* (2018).
- 22 Stewart, F. M. & Levin, B. R. The population biology of bacterial viruses: why be temperate. *Theoretical Population Biology* **26**, 93–117 (1984).
- 23 Maslov, S. & Sneppen, K. Well-temperate phage: optimal bet-hedging against local environmental collapses. *Scientific Reports* **5**, 10523 (2015).
- 24 Diekmann, O., Heesterbeek, H. & Britton, T. *Mathematical Tools for Understanding Infectious Disease Dynamics* (Princeton University Press, Princeton, NJ, 2012).
- 25 Jones, D. & Smith, H. Bacteriophage and bacteria in a flow reactor. *Bull. Math. Biol.* **73**, 2357–2383 (2011).
- 26 Smith, H. L. & Thieme, H. R. Persistence of bacteria and phages in a chemostat. *J. Math. Biol.* **64**, 951–979 (2012).
- 27 Krysiak-Baltyn, K., Martin, G. J. O., Stickland, A. D., Scales, P. J. & Gras, S. L. Computational models of populations of bacteria and lytic phage. *Critical Reviews in Microbiology* **42**, 942–968 (2016).
- 28 Berngruber, T. W., Froissart, R., Choisy, M. & Gandon, S. Evolution of virulence in emerging epidemics. *PLoS pathogens* **9**, e1003209 (2013).
- 29 Gandon, S. Why be temperate: lessons from bacteriophage  $\lambda$ . *Trends in microbiology* **24**, 356–365 (2016).
- 30 Campbell, A. Conditions for the existence of bacteriophage. *Evolution* **15**, 153–165 (1961).
- 31 Levin, B. R., Stewart, F. M. & Chao, L. Resource-limited growth, competition, and predation: a model and experimental studies with bacteria and bacteriophage. *American Naturalist* **111**, 3–24 (1977).
- 32 Levin, B. R. Nasty viruses, costly plasmids, population dynamics, and the conditions for establishing and maintaining CRISPR-mediated adaptive immunity in bacteria. *PLoS Genetics* **6**, e1001171 (2010).
- 33 Diekmann, O., Heesterbeek, J. & Metz, J. On the definition and the computation of the basic reproduction ratio  $R_0$  in models for infectious diseases in heterogeneous populations. *J. Math. Biol.* **28**, 365–382 (1990).
- 34 Diekmann, O., Heesterbeek, J. A. P. & Roberts, M. G. The construction of next-generation matrices for compartmental epidemic models. *Journal of the Royal Society Interface* **7**, 873–885 (2010).
- 35 Forterre, P. Manipulation of cellular syntheses and the nature of viruses: The virocell concept. *Comptes Rendus Chimie* **14**, 392 – 399 (2011). De la chimie de synthèse la biologie de synthèse.
- 36 Forterre, P. The virocell concept and environmental microbiology. *ISME J* **7**, 233–236 (2013).
- 37 Goldhill, D. H. & Turner, P. E. The evolution of life history trade-offs in viruses. *Current opinion in virology* **8**, 79–84 (2014).
- 38 Thingstad, T. F. & Bratbak, G. Microbial oceanography: Viral strategies at sea. *Nature* **531**, 454–455 (2016).
- 39 Brum, J., Hurwitz, B., Schofield, O., Ducklow, H. & Sullivan, M. Seasonal time bombs: dominant temperate viruses affect southern ocean microbial dynamics. *ISME J* **10**, 437–449 (2016).
- 40 Day, T. & Gandon, S. Applying population-genetic models in theoretical evolutionary epidemiology. *Ecology Letters* **10**, 876–888 (2007).
- 41 Lion, S. & Metz, J. A. Beyond  $R_0$  maximisation: On pathogen evolution and environmental dimensions. *Trends in Ecology and Evolution* **33**, 458 – 473 (2018).
- 42 Wallinga, J. & Lipsitch, M. How generation intervals shape the relationship between growth rates and reproductive numbers. *Proceedings of the Royal Society B: Biological Sciences* **274**, 599–604 (2007).
- 43 Park, S. W., Champredon, D., Weitz, J. & Dushoff, J. Exploring how generation intervals link strength and speed of epidemics. *bioRxiv:312397* (2018).
- 44 Ewald, P. W. *Evolution of Infectious Disease* (Oxford University Press, Oxford, UK, 1994).
- 45 Lenski, R. E. & May, R. M. The evolution of virulence in parasites and pathogens: reconciliation between two competing hypotheses. *Journal of theoretical biology* **169**, 253–265 (1994).
- 46 Lipsitch, M., Siller, S. & Nowak, M. A. The evolution of virulence in pathogens with vertical and horizontal transmission. *Evolution* **50**, 1729–1741 (1996).
- 47 Frank, S. A. Models of parasite virulence. *The Quarterly review of biology* **71**, 37–78 (1996).
- 48 Turner, P. E., Cooper, V. S. & Lenski, R. E. Tradeoff between horizontal and vertical modes of transmission in bacterial plasmids. *Evolution* **52**, 315–329 (1998).
- 49 Brown, S. P., Hochberg, M. E. & Grenfell, B. T. Does multiple infection select for raised virulence? *Trends in microbiology* **10**, 401–405 (2002).
- 50 Ebert, D. & Bull, J. J. Challenging the trade-off model for the evolution of virulence: is virulence management feasible? *Trends in microbiology* **11**, 15–20 (2003).
- 51 Alizon, S., Hurford, A., Mideo, N. & Van Baalen, M. Virulence evolution and the trade-off hypothesis: history, current state of affairs and the future. *Journal of evolutionary biology* **22**, 245–259 (2009).
- 52 Bonhoeffer, S., Lenski, R. E. & Ebert, D. The curse of the



- pharaoh: The evolution of virulence in pathogens with long living propagules. *Proceedings of the Royal Society of London Series B-Biological Sciences* **263**, 715–721 (1996).
- 53 Gandon, S. The curse of the pharaoh hypothesis. *Proceedings of the Royal Society of London Series B-Biological Sciences* **265**, 1545–1552 (1998).
- 54 Antonovics, J. *et al.* The evolution of transmission mode. *Phil. Tran. Roy. Soc. London B: Biol. Sci.* **372**, 20160083 (2017).
- 55 Gulbudak, H. & Weitz, J. S. Heterogeneous virus strategies promote coexistence in virus-microbe systems. *J. Theor. Biol* **462**, 65–84 (2019).
- 56 Kourilsky, P. Lysogenization by bacteriophage-lambda 1. Multiple infection and lysogenic response. *Molecular and General Genetics* **122**, 183–195 (1973).
- 57 St. Pierre, F. & Endy, D. Determination of cell fate selection during phage lambda infection. *Proc. Natl. Acad. Sci. USA* **105**, 20705–20710 (2008).
- 58 Weitz, J. S., Mileyko, Y., Joh, R. I. & Voit, E. O. Collective decision making in bacterial viruses. *Biophysical Journal* **95**, 2673–2680 (2008).
- 59 Avlund, M., Dodd, I. B., Semsey, S., Sneppen, K. & Krishna, S. Why do phage play dice? *Journal of virology* **83**, 11416–11420 (2009).
- 60 Zeng, L. *et al.* Decision making at a subcellular level determines the outcome of bacteriophage infection. *Cell* **141**, 682–691 (2010).
- 61 Erez, Z. *et al.* Communication between viruses guides lysis–lysogeny decisions. *Nature* **541**, 488–493 (2017).
- 62 Schatz, D. *et al.* Communication via extracellular vesicles enhances viral infection of a cosmopolitan alga. *Nature Microbiology* **2**, 1485–1492 (2017).
- 63 Weitz, J. S. *Quantitative Viral Ecology: Dynamics of Viruses and Their Microbial Hosts* (Princeton University Press, Princeton, NJ, 2015).
- 64 Beretta, E. & Kuang, Y. Modeling and analysis of a marine bacteriophage infection. *Math. Biosci.* **149**, 57–76 (1998).
- 65 Record, N. R., Talmy, D. & Vage, S. Quantifying tradeoffs for marine viruses. *Frontiers in Marine Science* **3**, 251 (2016).
